# Supplementary material for: A Complex Competitive Exclusion Culture Reduces Campylobacter jejuni Colonization in Broiler Chickens at Slaughter Age In Vivo
Source: MDPI journal article supplement (doi:10.3390/vetsci9040181), 2022-04-11
Supplement: s1 [file s1]

**Supplementary Table S1.** Mean body weight (g) of broiler chickens in the control group during the animal trial. Ten randomized broiler chickens were weighed daily.

| Day       |       |               |       |       |       |       |       |        |        |        |        |        |        |        |        |        |                               |      |
|-----------|-------|---------------|-------|-------|-------|-------|-------|--------|--------|--------|--------|--------|--------|--------|--------|--------|-------------------------------|------|
|           | d1    | d2            | d3    | d4    | d5    | d6    | d7    | d8     | d9     | d10    | d11    | d12    | D13    | d14    | d15    | d16    | <sup>1</sup> d 33<br>Necropsy |      |
|           | 36    | 36            | 56    | 51    | 77    | 92    | 126   | 97     | 166    | 203    | 240    | 187    | 224    | 233    | 354    | 376    | 1765                          | 1120 |
|           | 37    | 49            | 60    | 53    | 81    | 107   | 126   | 102    | 175    | 210    | 264    | 198    | 294    | 242    | 395    | 456    | 1780                          | 1460 |
|           | 38    | 49            | 62    | 69    | 82    | 114   | 126   | 125    | 197    | 221    | 266    | 203    | 300    | 270    | 410    | 474    | 1800                          | 1660 |
|           | 38    | 50            | 63    | 72    | 90    | 118   | 132   | 137    | 198    | 244    | 278    | 214    | 316    | 339    | 412    | 485    | 1800                          | 1700 |
|           | 39    | 51            | 65    | 75    | 92    | 120   | 135   | 149    | 199    | 248    | 283    | 242    | 330    | 353    | 421    | 494    | 1800                          | 1742 |
|           | 39    | <del>52</del> | 65    | 80    | 93    | 122   | 141   | 163    | 199    | 249    | 284    | 242    | 335    | 354    | 430    | 505    | 1852                          | 1757 |
|           | 40    | 55            | 66    | 80    | 96    | 127   | 143   | 170    | 205    | 260    | 292    | 249    | 339    | 355    | 442    | 515    | 1855                          | 1764 |
|           | 40    | 55            | 68    | 82    | 106   | 129   | 148   | 172    | 216    | 260    | 294    | 263    | 341    | 380    | 475    | 542    | 1880                          | 1800 |
|           | 40    | 58            | 69    | 84    | 107   | 130   | 152   | 172    | 219    | 263    | 298    | 267    | 350    | 393    | 492    | 610    | 1886                          | 1821 |
|           | 40    | 60            | 71    | 84    | 109   | 132   | 156   | 200    | 222    | 284    | 320    | 268    | 360    | 400    | 550    | 615    | 1907                          | 1861 |
| BW<br>(g) | 38.7  | 51.5          | 64.5  | 73.0  | 93.3  | 119.1 | 138.5 | 148.7  | 199.6  | 244.2  | 281.9  | 233.3  | 318.9  | 331.9  | 438.1  | 507.2  | 1926                          | 1876 |
|           |       |               |       |       |       |       |       |        |        |        |        |        |        |        |        |        | 1930                          | 1880 |
|           | d17   | d18           | d19   | d20   | d21   | d22   | d23   | d24    | d25    | d26    | d27    | d28    | d29    | d30    | d31    | d32    | 1944                          | 1893 |
|           | 363   | 394           | 608   | 569   | 482   | 812   | 746   | 909    | 658    | 712    | 744    | 820    | 859    | 910    | 1566   | 1672   | 1987                          | 1924 |
|           | 484   | 402           | 616   | 575   | 714   | 825   | 859   | 931    | 755    | 862    | 879    | 1000   | 1086   | 1160   | 1659   | 1708   | 2150                          | 1925 |
|           | 501   | 430           | 645   | 710   | 725   | 884   | 891   | 1015   | 915    | 979    | 1146   | 1188   | 1288   | 1341   | 1686   | 1730   | 2179                          | 1980 |
|           | 515   | 460           | 680   | 759   | 745   | 890   | 900   | 1045   | 1033   | 979    | 1157   | 1208   | 1305   | 1449   | 1721   | 1853   | 2200                          | 2089 |
|           | 518   | 512           | 698   | 762   | 790   | 920   | 987   | 1060   | 1132   | 1060   | 1230   | 1232   | 1452   | 1470   | 1777   | 1921   | 2217                          | 2125 |
|           | 540   | 513           | 702   | 765   | 800   | 930   | 1033  | 1065   | 1138   | 1089   | 1255   | 1244   | 1560   | 1484   | 1795   | 1960   |                               |      |
|           | 543   | 527           | 715   | 782   | 812   | 964   | 1060  | 1233   | 1155   | 1100   | 1264   | 1280   | 1570   | 1753   | 1799   | 2008   |                               |      |
|           | 587   | 533           | 810   | 797   | 825   | 1052  | 1065  | 1297   | 1200   | 1130   | 1273   | 1300   | 1580   | 1784   | 1854   | 2021   |                               |      |
|           | 596   | 541           | 858   | 810   | 850   | 1124  | 1202  | 1336   | 1206   | 1160   | 1313   | 1300   | 1580   | 1798   | 1865   | 2084   |                               |      |
|           | 611   | 552           | 885   | 919   | 860   | 922   | 1237  | 1245   | 1207   | 1160   | 1414   | 1300   | 1607   | 1834   | 2057   | 2105   |                               |      |
| BW<br>(g) | 525.8 | 486.4         | 721.7 | 744.8 | 760.3 | 932.3 | 998   | 1113.6 | 1039.9 | 1023.1 | 1167.5 | 1187.2 | 1388.7 | 1498.3 | 1777.9 | 1906.2 | 1867.6                        |      |

<sup>1</sup>The weights on the day of necropsy were obtained from the 36 sentinels examined

**Supplementary Table S2.** Mean body weight (g) of broiler chickens treated with the CE culture during the animal trial. Ten randomized broiler chickens were weighed daily.

| day    |       |      |       |       |       |        |        |        |        |        |        |        |        |        |        |                              |        |      |
|--------|-------|------|-------|-------|-------|--------|--------|--------|--------|--------|--------|--------|--------|--------|--------|------------------------------|--------|------|
| d1     | d2    | d3   | d4    | d5    | d6    | d7     | d8     | d9     | d10    | d11    | d12    | d13    | d14    | d15    | d16    | <sup>1</sup> d33<br>Necropsy |        |      |
| 59     | 56    | 62   | 107   | 129   | 166   | 193    | 224    | 280    | 301    | 379    | 425    | 497    | 512    | 568    | 603    | 1523                         | 1954   |      |
| 60     | 56    | 69   | 104   | 133   | 174   | 198    | 237    | 298    | 340    | 405    | 433    | 520    | 516    | 617    | 638    | 1665                         | 1977   |      |
| 60     | 57    | 71   | 104   | 120   | 147   | 190    | 222    | 275    | 300    | 359    | 415    | 486    | 511    | 559    | 597    | 1772                         | 2049   |      |
| 61     | 58    | 75   | 104   | 117   | 146   | 177    | 213    | 260    | 293    | 351    | 413    | 476    | 489    | 542    | 581    | 1777                         | 2055   |      |
| 61     | 61    | 76   | 102   | 116   | 139   | 174    | 209    | 255    | 278    | 348    | 397    | 447    | 486    | 532    | 548    | 1795                         | 2066   |      |
| 61     | 62    | 78   | 101   | 115   | 137   | 170    | 202    | 238    | 262    | 347    | 383    | 438    | 468    | 501    | 539    | 1798                         | 2068   |      |
| 62     | 64    | 80   | 100   | 114   | 133   | 169    | 199    | 210    | 259    | 309    | 380    | 410    | 447    | 490    | 532    | 1802                         | 2077   |      |
| 63     | 65    | 81   | 100   | 110   | 129   | 159    | 177    | 201    | 249    | 269    | 374    | 371    | 435    | 479    | 502    | 1818                         | 2112   |      |
| 64     | 67    | 82   | 100   | 101   | 126   | 156    | 173    | 198    | 236    | 258    | 364    | 362    | 433    | 477    | 500    | 1818                         | 2113   |      |
| 64     | 73    | 82   | 97    | 100   | 123   | 150    | 168    | 188    | 209    | 242    | 355    | 349    | 401    | 469    | 441    | 1855                         | 2132   |      |
| BW (g) | 61.5  | 61.9 | 75.6  | 101.9 | 115.5 | 142    | 173.6  | 202.4  | 240.3  | 272.7  | 326.7  | 393.9  | 435.6  | 469.8  | 523.4  | 548.1                        | 1878   | 2141 |
|        |       |      |       |       |       |        |        |        |        |        |        |        |        |        |        |                              | 1885   | 2159 |
| d17    | d18   | d19  | d20   | d21   | d22   | d23    | d24    | d25    | d26    | d27    | d28    | d29    | d30    | d31    | d32    |                              |        |      |
| 560    | 547   | 653  | 667   | 892   | 786   | 866    | 1074   | 1037   | 1101   | 1360   | 1298   | 1546   | 1380   | 1510   | 1523   | 1894                         | 2179   |      |
| 596    | 605   | 662  | 698   | 898   | 957   | 1018   | 1160   | 1060   | 1190   | 1400   | 1430   | 1565   | 1418   | 1730   | 1665   | 1895                         | 2186   |      |
| 614    | 618   | 700  | 730   | 906   | 1033  | 1022   | 1160   | 1168   | 1213   | 1400   | 1502   | 1588   | 1640   | 1782   | 1772   | 1907                         | 2206   |      |
| 680    | 633   | 707  | 812   | 918   | 1051  | 1026   | 1172   | 1315   | 1245   | 1400   | 1515   | 1699   | 1649   | 1819   | 1777   | 1916                         | 2313   |      |
| 681    | 648   | 722  | 887   | 953   | 1061  | 1042   | 1200   | 1333   | 1250   | 1400   | 1520   | 1709   | 1699   | 1867   | 1795   | 1927                         | 2775   |      |
| 702    | 734   | 740  | 919   | 988   | 1067  | 1114   | 1215   | 1359   | 1350   | 1407   | 1533   | 1730   | 1840   | 1879   | 1798   |                              |        |      |
| 709    | 755   | 750  | 960   | 998   | 1105  | 1196   | 1220   | 1375   | 1379   | 1408   | 1544   | 1732   | 1850   | 1987   | 1802   |                              |        |      |
| 774    | 810   | 764  | 966   | 1107  | 1205  | 1342   | 1400   | 1521   | 1530   | 1964   | 1685   | 2100   | 2239   | 2325   | 1855   |                              |        |      |
| 730    | 765   | 798  | 994   | 999   | 1118  | 1206   | 1290   | 1453   | 1408   | 1600   | 1601   | 1742   | 1920   | 1992   | 1818   |                              |        |      |
| 737    | 795   | 805  | 1000  | 1041  | 1152  | 1339   | 1315   | 1513   | 1490   | 1620   | 1624   | 1876   | 1980   | 2064   | 1818   |                              |        |      |
| BW (g) | 678.3 | 691  | 730.1 | 863.3 | 970   | 1053.5 | 1117.1 | 1220.6 | 1313.4 | 1315.6 | 1495.9 | 1525.2 | 1728.7 | 1761.5 | 1895.5 | 1762.3                       | 1987.5 |      |

<sup>1</sup>The weights on the day of the necropsy are from the 36 sentinels examined
