# Supplementary material for: A Complex Competitive Exclusion Culture Reduces Campylobacter jejuni Colonization in Broiler Chickens at Slaughter Age In Vivo
Source: MDPI journal article supplement (doi:10.3390/vetsci9040181), 2022-04-11
Supplement: s1 [file s1]

**Supplementary Table S3.** *C. jejuni* counts (log<sub>10</sub> MPN) of seeder and sentinel broiler chickens at 2, 3, 4, 8, 11, 16 and 18 days after inoculation from cloacal swabs.

| <sup>1</sup> 2 d post inoculation         |            | <sup>2</sup> 3 d post inoculation |            | <sup>2</sup> 4 d post inoculation |            | <sup>2</sup> 8 d post inoculation |            | <sup>2</sup> 11 d post inoculation |            | <sup>2</sup> 16 d post inoculation |            | <sup>2</sup> 18 d post inoculation |            |      |
|-------------------------------------------|------------|-----------------------------------|------------|-----------------------------------|------------|-----------------------------------|------------|------------------------------------|------------|------------------------------------|------------|------------------------------------|------------|------|
| control                                   | CE-culture | control                           | CE-culture | control                           | CE-culture | control                           | CE-culture | control                            | CE-culture | control                            | CE-culture | control                            | CE-culture |      |
| 0.36                                      | 2.36       | nd                                | nd         | nd                                | 1.36       | 4.36                              | 4.36       | 5.36                               | 3.36       | 6.36                               | 4.36       | 7.36                               | 3.36       |      |
| 3.36                                      | 1.36       | nd                                | nd         | nd                                | nd         | 5.36                              | 3.36       | 5.36                               | 3.36       | 6.36                               | 6.36       | 6.36                               | 6.36       |      |
| 2.36                                      | 1.36       | nd                                | nd         | nd                                | nd         | 5.36                              | 3.36       | 6.36                               | 4.36       | 4.36                               | 3.36       | 6.36                               | 4.36       |      |
| 0.36                                      | 2.36       | nd                                | nd         | 2.36                              | nd         | 5.36                              | 4.36       | 7.36                               | 5.36       | 6.36                               | 5.36       | 8.36                               | 6.36       |      |
| 1.36                                      | 2.36       | nd                                | nd         | nd                                | 1.36       | 4.36                              | 3.36       | 5.36                               | 3.36       | 5.36                               | 2.36       | 5.36                               | 4.36       |      |
| 1.36                                      | 1.36       | nd                                | 1.36       | nd                                | 3.36       | 5.36                              | 4.36       | 5.36                               | 5.36       | 5.36                               | 6.36       | 5.36                               | 4.36       |      |
| 0.36                                      | 3.36       | nd                                | nd         | nd                                | nd         | 5.36                              | 2.36       | 5.36                               | 5.36       | 5.36                               | 5.36       | 5.36                               | 5.36       |      |
| 3.36                                      | 2.36       | nd                                | 2.36       | nd                                | 3.36       | 4.36                              | 3.36       | 4.36                               | 5.36       | 5.36                               | 4.36       | 5.36                               | 5.36       |      |
| 1.36                                      | 1.36       | nd                                | nd         | nd                                | nd         | 5.36                              | 1.36       | 5.36                               | 4.36       | 5.36                               | 5.36       | 5.36                               | 5.36       |      |
| 3.36                                      | 0.36       | nd                                | nd         | nd                                | 0.36       | 7.36                              | 2.36       | 5.36                               | 3.36       | 6.36                               | 4.36       | 6.36                               | 4.36       |      |
| 3.36                                      | 3.36       | nd                                | nd         | nd                                | 1.36       | 5.36                              | 4.36       | 5.36                               | 4.36       | 5.36                               | 6.36       | 4.36                               | 5.36       |      |
| 0.36                                      | 0.36       | nd                                | nd         | nd                                | nd         | 5.36                              | 4.36       | 6.36                               | 5.36       | 6.36                               | 4.36       | 5.36                               | 4.36       |      |
| 1.36                                      | 2.36       | nd                                | nd         | nd                                | nd         | 5.36                              | 3.36       | 6.36                               | 3.36       | 5.36                               | 5.36       | 6.36                               | 4.36       |      |
| 2.36                                      | 1.36       | nd                                | nd         | nd                                | 1.36       | 6.36                              | 4.36       | 8.36                               | 4.36       | 7.36                               | 4.36       | 6.36                               | 5.36       |      |
| 2.36                                      | 2.36       | nd                                | nd         | nd                                | nd         | 5.36                              | 2.36       | 6.36                               | 3.36       | 6.36                               | 4.36       | 6.36                               | 5.36       |      |
| 2.36                                      | 3.36       | nd                                | 3.36       | nd                                | 3.36       | 5.36                              | 3.36       | 6.36                               | 4.36       | 6.36                               | 5.36       | 5.36                               | 5.36       |      |
| 3.36                                      | 3.36       | nd                                | nd         | nd                                | 2.36       | 5.36                              | 4.36       | 6.36                               | 3.36       | 7.36                               | 4.36       | 7.36                               | 4.36       |      |
| 0.36                                      | 2.36       | 0.36                              | nd         | 1.36                              | 1.36       | 5.36                              | 4.36       | 5.36                               | 5.36       | 5.36                               | 4.36       | 5.36                               | 4.36       |      |
|                                           |            | nd                                | nd         | nd                                | nd         | 5.36                              | 2.36       | 8.36                               | 3.36       | 4.36                               | 5.36       | 6.36                               | 4.36       |      |
|                                           |            | nd                                | nd         | nd                                | nd         | 5.36                              | 3.36       | 6.36                               | 5.36       | 5.36                               | 4.36       | 6.36                               | 5.36       |      |
|                                           |            | nd                                | nd         | nd                                | nd         | 4.36                              | 3.36       | 4.36                               | 3.36       | 6.36                               | 4.36       | 6.36                               | 3.36       |      |
|                                           |            | nd                                | nd         | nd                                | 1.36       | 4.36                              | 4.36       | 5.36                               | 3.36       | 5.36                               | 2.36       | 4.36                               | 4.36       |      |
|                                           |            | nd                                | nd         | nd                                | 0.36       | 3.36                              | 4.36       | 5.36                               | 3.36       | 5.36                               | 4.36       | 5.36                               | 5.36       |      |
|                                           |            | nd                                | nd         | nd                                | 1.36       | 6.36                              | 3.36       | 6.36                               | 4.36       | 6.36                               | 4.36       | 6.36                               | 3.36       |      |
|                                           |            | nd                                | nd         | nd                                | nd         | 5.36                              | 4.36       | 7.36                               | 4.36       | 6.36                               | 4.36       | 5.36                               | 3.36       |      |
|                                           |            | nd                                | 2.36       | nd                                | 3.36       | 5.36                              | 5.36       | 4.36                               | 5.36       | 6.36                               | 5.36       | 6.36                               | 5.36       |      |
|                                           |            | 4.36                              | 3.36       | nd                                | 3.36       | 4.36                              | 2.36       | 5.36                               | 3.36       | 4.36                               | 4.36       | 4.36                               | 2.36       |      |
|                                           |            | nd                                | nd         | nd                                | 1.36       | 5.36                              | 3.36       | 5.36                               | 4.36       | 6.36                               | 4.36       | 6.36                               | 5.36       |      |
|                                           |            | nd                                | 0.36       | nd                                | 3.36       | 4.36                              | 5.36       | 5.36                               | 4.36       | 6.36                               | 4.36       | 6.36                               | 4.36       |      |
|                                           |            | nd                                | nd         | nd                                | nd         | 5.36                              | 4.36       | 4.36                               | 3.36       | 6.36                               | 4.36       | 6.36                               | 4.36       |      |
|                                           |            | nd                                | 3.36       | nd                                | 2.36       | 4.36                              | 3.36       | 5.36                               | 5.36       | 6.36                               | 5.36       | 6.36                               | 4.36       |      |
|                                           |            | nd                                | nd         | nd                                | 0.36       | 4.36                              | 3.36       | 5.36                               | 3.36       | 6.36                               | 5.36       | 5.36                               | 6.36       |      |
|                                           |            | nd                                | nd         | nd                                | 3.36       | 5.36                              | 2.36       | 5.36                               | 3.36       | 6.36                               | 4.36       | 6.36                               | 4.36       |      |
|                                           |            | nd                                | 2.36       | 1.36                              | 3.36       | 5.36                              | 4.36       | 6.36                               | 4.36       | 6.36                               | 5.36       | 5.36                               | 5.36       |      |
|                                           |            | nd                                | nd         | nd                                | nd         | 4.36                              | 3.36       | 4.36                               | 4.36       | 6.36                               | 3.36       | 5.36                               | 4.36       |      |
|                                           |            | nd                                | nd         | nd                                | nd         | 6.36                              | 7.36       | 5.36                               | 4.36       | 6.36                               | 5.36       | 7.36                               | 4.36       |      |
| median log <sub>10</sub> MPN/cloacal swab | 1.86       | 2.36                              | 2.36       | 2.36                              | 1.36       | 1.72                              | 5.36       | 3.36                               | 5.36       | 4.36                               | 6.36       | 4.36                               | 6.36       | 4.36 |
| Log reduction                             | -          | -                                 | -          | -                                 | -          | -                                 | 2          | 2                                  | 1          | 1                                  | 2          | 2                                  | 2          | 2    |

<sup>1</sup>median values in log<sub>10</sub> MPN/g from seeders  $n = 18$ ; <sup>2</sup>median values in log<sub>10</sub> MPN/g from sentinels  $n = 36$ ; “nd” indicates that *C. jejuni* was “not detectable”.
