# Supplementary material for: A Complex Competitive Exclusion Culture Reduces Campylobacter jejuni Colonization in Broiler Chickens at Slaughter Age In Vivo
Source: MDPI journal article supplement (doi:10.3390/vetsci9040181), 2022-04-11
Supplement: s1 [file s1]

**Supplementary Table S4.** *C. jejuni* cecal and colon colonization of sentinel broiler chickens at 33 days of age after necropsy.

|                                      | Cecum       |             | Colon       |             |
|--------------------------------------|-------------|-------------|-------------|-------------|
|                                      | control     | CE-culture  | control     | CE-culture  |
|                                      | 8.36        | 5.36        | 7.36        | 5.36        |
|                                      | 7.36        | 6.36        | 7.36        | 6.36        |
|                                      | 8.36        | 6.36        | 6.36        | 7.36        |
|                                      | 7.36        | 7.36        | 9.36        | 5.36        |
|                                      | 7.36        | 7.36        | 7.36        | 7.36        |
|                                      | 6.36        | 6.36        | 6.36        | 6.36        |
|                                      | 7.36        | 9.36        | 6.36        | 7.36        |
|                                      | 8.36        | 6.36        | 8.36        | 5.36        |
|                                      | 7.36        | 7.36        | 7.36        | 5.36        |
|                                      | 7.36        | 7.36        | 7.36        | 6.36        |
|                                      | 7.36        | 7.36        | 7.36        | 8.36        |
|                                      | 6.36        | 6.36        | 4.36        | 6.36        |
|                                      | 7.36        | 6.36        | 6.36        | 6.36        |
|                                      | 7.36        | 6.36        | 6.36        | 5.36        |
|                                      | 8.36        | 6.36        | 7.36        | 5.36        |
|                                      | 7.36        | 6.36        | 6.36        | 6.36        |
|                                      | 7.36        | 5.36        | 5.36        | 4.36        |
|                                      | 6.36        | 8.36        | 5.36        | 5.36        |
|                                      | 7.36        | 6.36        | 7.36        | 5.36        |
|                                      | 8.36        | 7.36        | 7.36        | 7.36        |
|                                      | 8.36        | 5.36        | 7.36        | 3.36        |
|                                      | 6.36        | 5.36        | 6.36        | 5.36        |
|                                      | 6.36        | 7.36        | 7.36        | 5.36        |
|                                      | 7.36        | 6.36        | 6.36        | 5.36        |
|                                      | 7.36        | 8.36        | 6.36        | 6.36        |
|                                      | 8.36        | 6.36        | 9.36        | 6.36        |
|                                      | 7.36        | 7.36        | 7.36        | 5.36        |
|                                      | 6.36        | 6.36        | 6.36        | 5.36        |
|                                      | 9.36        | 4.36        | 8.36        | 5.36        |
|                                      | 7.36        | 7.36        | 6.36        | 7.36        |
|                                      | 7.36        | 6.36        | 7.36        | 5.36        |
|                                      | 8.36        | 5.36        | 8.36        | 6.36        |
|                                      | 6.36        | 6.36        | 7.36        | 8.36        |
|                                      | 7.36        | 5.36        | 5.36        | 5.36        |
|                                      | 8.36        | 6.36        | 7.36        | 4.36        |
|                                      | 7.36        | 7.36        | 6.36        | 6.36        |
| <b>median log<sub>10</sub> MPN/g</b> | <b>7.36</b> | <b>6.36</b> | <b>7.36</b> | <b>5.36</b> |
| <b>log reduction</b>                 | <b>1</b>    |             | <b>2</b>    |             |
